# Supplementary material for: Surface Water Quality Assessment through Remote Sensing Based on the Box–Cox Transformation and Linear Regression
Source: MDPI journal article supplement (doi:10.3390/w15142606), 2023-07-18
Supplement: s1 [file s1]

## Supplementary Materials

**Table S1.** Estimated and observed water quality data for the model development and validation.

|                   | Sampling date | Observed data |      |       | Estimated data |      |       |
|-------------------|---------------|---------------|------|-------|----------------|------|-------|
|                   |               | TDS           | TOC  | Chl-a | TDS            | TOC  | Chl-a |
| Model development | 04/05/2015    | 93.44         | 4.88 | 17.66 | 97.01          | 4.84 | 26.71 |
|                   | 04/05/2015    | 90.24         | 4.35 | 37.38 | 83.69          | 4.26 | 33.55 |
|                   | 04/05/2015    | 94.08         | 4.55 | 22.34 | 94.33          | 4.70 | 16.16 |
|                   | 22/10/2015    | 103.04        | 3.60 | 7.96  | 100.62         | 3.94 | 2.12  |
|                   | 22/10/2015    | 96.64         | 3.86 | 2.72  | 98.56          | 3.69 | 1.11  |
|                   | 22/10/2015    | 96            | 3.91 | 0.10  | 97.82          | 3.77 | 0.44  |
|                   | 09/05/2016    | 99.84         | 3.85 | 0.10  | 97.29          | 3.77 | 0.29  |
|                   | 09/05/2016    | 81.28         | 3.98 | 11.59 | 88.36          | 3.78 | 7.79  |
|                   | 09/05/2016    | 92.16         | 3.72 | 0.1   | 95.28          | 4.06 | 0.96  |
|                   | 15/09/2016    | 106.5         | 5.35 | 0.1   | 106.72         | 5.38 | 1.15  |
|                   | 15/09/2016    | 105           | 5.38 | 2.84  | 104.11         | 5.34 | 1.51  |
|                   | 15/09/2016    | 100           | 5.93 | 2.37  | 100.89         | 5.95 | 0.79  |
|                   | 16/03/2017    | 95.36         | 4.26 | 4.73  | 88.49          | 4.21 | 8.30  |
|                   | 16/03/2017    | 89.6          | 4.53 | 9.60  | 89.00          | 4.40 | 11.88 |
|                   | 16/03/2017    | 89.6          | 4.08 | 5.94  | 94.27          | 4.23 | 4.63  |
|                   | 21/09/2017    | 110.72        | 6.03 | 0.1   | 108.72         | 5.76 | 0.01  |
|                   | 21/09/2017    | 112           | 5.32 | 0.1   | 110.64         | 5.40 | 0.21  |
|                   | 21/09/2017    | 108.16        | 5.99 | 0.1   | 109.92         | 6.07 | 0.35  |
| Model validation  | 04/05/2015    | 98.56         | 4.23 | 14.19 | 96.44          | 4.61 | 40.80 |
|                   | 22/10/2015    | 95.36         | 3.46 | 0.10  | 100.71         | 4.11 | 0.87  |
|                   | 09/05/2016    | 89.60         | 3.96 | 1.20  | 94.11          | 3.76 | 1.68  |
|                   | 15/09/2016    | 125.44        | 5.46 | 0.10  | 104.05         | 5.62 | 1.80  |
|                   | 16/03/2017    | 85.12         | 4.41 | 7.66  | 90.02          | 4.65 | 12.72 |
|                   | 21/09/2017    | 111.36        | 5.59 | 0.10  | 112.82         | 5.78 | 0.11  |
|                   | 24/05/2018    | 206.72        | 6.01 | 0.82  | 207.16         | 6.04 | 0.84  |
|                   | 24/05/2018    | 129.92        | 6.70 | 0.10  | 128.60         | 6.50 | 0.11  |
|                   | 24/05/2018    | 124.16        | 5.51 | 0.10  | 124.42         | 5.71 | 0.12  |
|                   | 24/05/2018    | 139.52        | 6.51 | 0.95  | 140.64         | 6.45 | 0.76  |
|                   | 06/08/2018    | 116.10        | 6.11 | 4.08  | 119.33         | 6.17 | 4.68  |
|                   | 06/08/2018    | 147.84        | 5.35 | 9.92  | 142.41         | 5.21 | 10.03 |
|                   | 06/08/2018    | 112.96        | 5.20 | 5.24  | 114.73         | 5.37 | 9.16  |
|                   | 06/08/2018    | 144.64        | 5.72 | 7.27  | 145.04         | 5.57 | 7.78  |
|                   | 17/01/2019    | 77.44         | 5.19 | 0.10  | 68.57          | 5.27 | 0.09  |
|                   | 17/01/2019    | 77.44         | 5.65 | 0.10  | 84.76          | 5.39 | 0.08  |
|                   | 17/01/2019    | 76.16         | 5.67 | 0.10  | 76.15          | 5.65 | 0.10  |
|                   | 17/01/2019    | 76.80         | 5.53 | 0.10  | 77.94          | 5.72 | 0.13  |
